# Supplementary material
Source: PubMed Central journal article supplement (PMC5862740)
Supplement: NIHMS921730-supplement.pdf [file NIHMS921730-supplement.pdf]

# The Multifaceted Role of Ventromedial Prefrontal Cortex in Emotion, Decision-making, Social Cognition, and Psychopathology

## *Supplementary Information*

Supplementary Figure S1

Supplementary Methods

Supplementary Table S1

Supplementary References

## SUPPLEMENTARY FIGURE

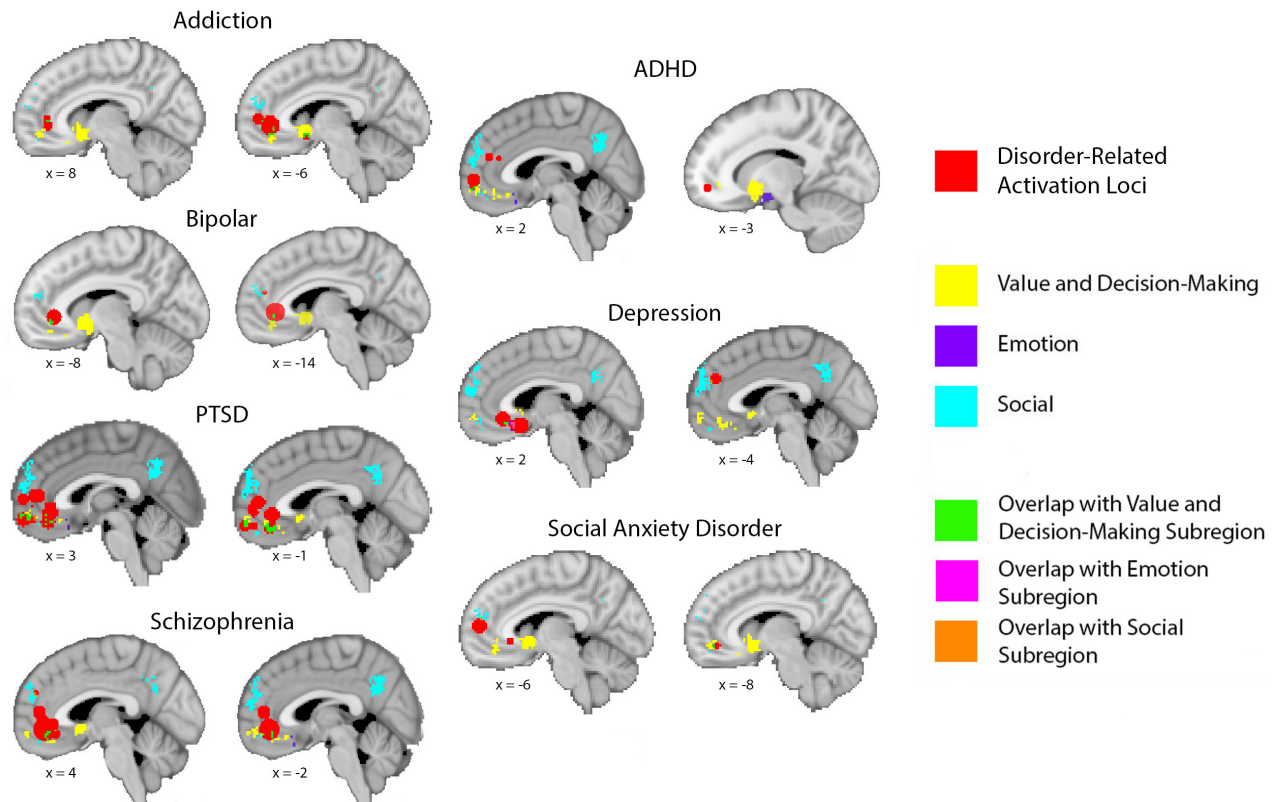

**Supplementary Figure S1. Association between vmPFC subregions and psychiatric disorders.** To define activation loci associated with each disorder, we used the results of previously published meta-analyses of fMRI findings related to each disorder to construct spheres representing the approximate volume of reported clusters at their respective peak coordinates (for details see **Supplementary Methods** and **Supplementary Table S1**). We plotted these disorder-related activation loci (in red) along with the domain-related loci (in separate colors; corresponding to the bottom row of **Figure 1**). Overlap between the disorder-related loci and domain-related loci is shown in green (for value and decision-making), pink (for emotion), and orange (for social). Using this approach, we found relatively large regions of overlap in some cases (*e.g.*, >30 voxels for the value and decision-making subregion and activation loci for addiction, depression, and schizophrenia, respectively), but fairly small regions of overlap in other cases (*e.g.*, <5 voxels for the social subregion and activation loci for bipolar, depression, and social anxiety disorder, respectively).

## SUPPLEMENTARY METHODS

Meta-analyses of fMRI data for **Figure 2** and **Supplementary Figure S1** were obtained by searching the PubMed database. The search terms included the combination of terms for each disorder (e.g., “depression”, “PTSD”, “addiction”, “social anxiety disorder”, etc.), “fMRI”, and “meta-analysis”. The search was restricted to meta-analyses of event-related fMRI studies of adults that were listed in the database on or after January 1st, 2006. For **Supplementary Figure S1**, spheres were created representing the approximate volume of reported significant clusters at their respective peak coordinates. This figure only includes loci in PFC ventral to  $z=30$ , anterior to  $y=8$ , and medial to  $-18 < x < 18$ . These loci were obtained from 22 separate meta-analyses (**Supplementary Table S1**).

Our search included the following disorders: addiction, PTSD, major depressive disorder, bipolar disorder, schizophrenia, social anxiety disorder, ADHD, OCD, specific phobia, generalized anxiety disorder, panic disorder, and eating disorders. Our search returned five meta-analyses on addiction. We excluded one that focused specifically on visual cortex and one that focused specifically on internet gambling disorder. The remaining three articles all included vmPFC clusters. Our search returned eight meta-analyses on PTSD. We excluded one for which we were not able to obtain the full text. Of the remaining seven articles, six included vmPFC clusters. Our search returned eight meta-analyses on depression. We excluded two that did not report coordinates and one that focused solely on reward processing. Of the remaining five articles, four included vmPFC clusters. Our search returned six meta-analyses on bipolar disorder, two of which included vmPFC clusters. Our search returned ten meta-analyses on schizophrenia. We excluded one for which we were not able to obtain the full text, one that focused specifically on ventral striatum, and one that focused specifically on corpus callosum. Of the remaining seven articles, five included vmPFC clusters. Our search returned four meta-analyses on social anxiety disorder, three of which included vmPFC clusters. Our search returned six meta-analyses on ADHD. We excluded one that did not report

coordinates. Of the remaining five articles, two included vmPFC clusters. Our search returned two meta-analyses on specific phobia, neither of which included a vmPFC cluster. Our search returned one meta-analysis on OCD, which included a vmPFC cluster. Our search returned one meta-analysis on anorexia, which did not include a vmPFC cluster. Our search returned zero meta-analyses for generalized anxiety disorder or panic disorder. Hence, the majority of eligible meta-analyses of psychiatric disorders included vmPFC clusters (3/3 for addiction, 6/7 for PTSD, 4/5 for depression, 2/6 for bipolar, 5/7 for schizophrenia, 3/4 for social anxiety disorder, 2/5 for ADHD, 1/1 for OCD, and 0/1 for anorexia; total of 26/39 or 67% across disorders).

## SUPPLEMENTARY TABLE

Supplementary Table S1. Meta-analyses yielding disorder-related fMRI activation loci for Figure 2 and Supplementary Figure S1.

| Authors              | Year | Title                                                                                                                       | Disorder   | Coords |    |     | Size                 |
|----------------------|------|-----------------------------------------------------------------------------------------------------------------------------|------------|--------|----|-----|----------------------|
|                      |      |                                                                                                                             |            | x      | y  | z   |                      |
| Engelmann et al. (1) | 2012 | Neural substrates of smoking cue reactivity: A meta-analysis of fMRI Studies                                                | Addiction  | -1     | 41 | 0   | 6016 mm <sup>3</sup> |
| Engelmann et al.     |      |                                                                                                                             | Addiction  | -15    | 52 | 29  | 1096 mm <sup>3</sup> |
| Schacht et al. (2)   | 2013 | Functional neuroimaging studies of alcohol cue reactivity: A quantitative meta-analysis and systematic review               | Addiction  | -2     | 8  | -10 | 2176 mm <sup>3</sup> |
| Schacht et al.       |      |                                                                                                                             | Addiction  | -2     | 52 | 6   | 872 mm <sup>3</sup>  |
| Luijten et al. (3)   | 2017 | Disruption of Reward Processing in Addiction: An Image-Based Meta-analysis of Functional Magnetic Resonance Imaging Studies | Addiction  | 12     | 42 | 6   | NA                   |
| Dickstein et al. (4) | 2006 | The neural correlates of attention deficit hyperactivity disorder: an ALE meta-analysis                                     | ADHD       | 0      | 59 | -7  | 17 voxels            |
| Dickstein et al.     | 2006 |                                                                                                                             | ADHD       | -14    | 51 | -7  | 16 voxels            |
| Dickstein et al.     | 2006 |                                                                                                                             | ADHD       | 6      | 35 | 19  | 25 voxels            |
| McCarthy et al. (5)  | 2014 | Identifying a consistent pattern of neural function in attention deficit hyperactivity disorder: a meta-analysis            | ADHD       | 4      | 44 | 20  | 25 voxels            |
| McCarthy et al.      | 2014 |                                                                                                                             | ADHD       | 2      | 58 | 0   | 88 voxels            |
| Wegbreit et al. (6)  | 2014 | Developmental Meta-Analysis of the Functional Neural Correlates of Bipolar Disorder                                         | Bipolar    | -2     | 36 | 0   | 1208 mm <sup>3</sup> |
| Chen et al. (7)      | 2011 | A quantitative meta-analysis of fMRI studies in bipolar disorder                                                            | Bipolar    | -2     | 46 | 18  | 208 mm <sup>3</sup>  |
| Chen et al.          | 2011 |                                                                                                                             | Bipolar    | -18    | 40 | -6  | 272 mm <sup>3</sup>  |
| Groenwold et al. (8) | 2013 | Emotional valence modulates brain functional abnormalities in depression: Evidence from a meta-analysis of fMRI studies     | Depression | 4      | 22 | -14 | 4 voxels             |

| Authors              | Year | Title                                                                                                               | Disorder   | Coords |    |     | Size                 |
|----------------------|------|---------------------------------------------------------------------------------------------------------------------|------------|--------|----|-----|----------------------|
|                      |      |                                                                                                                     |            | x      | y  | z   |                      |
| Palmer et al. (9)    | 2014 | A meta-analysis of changes in brain activity in clinical depression                                                 | Depression | 6      | 14 | -14 | 1928 mm <sup>3</sup> |
| Palmer et al.        |      |                                                                                                                     | Depression | 14     | 8  | -14 | 1928 mm <sup>3</sup> |
| Graham et al. (10)   | 2013 | Meta-analytic evidence for neuroimaging models of depression: State or trait?                                       | Depression | -4     | 44 | 28  | 224 mm <sup>3</sup>  |
| Graham et al.        |      |                                                                                                                     | Depression | 8      | 30 | -8  | 1920 mm <sup>3</sup> |
| Graham et al.        |      |                                                                                                                     | Depression | 10     | 46 | -6  | 464 mm <sup>3</sup>  |
| Sacher et al. (11)   | 2012 | Mapping the depressed brain: a meta-analysis of structural and functional alterations in major depressive disorder. | Depression | 8      | 35 | -4  | 80 mm <sup>3</sup>   |
| Sacher et al.        |      |                                                                                                                     | Depression | 12     | 20 | -4  | 80 mm <sup>3</sup>   |
| Boccia et al. (12)   | 2016 | Different neural modifications underpin PTSD after different traumatic events: an fMRI meta-analytic study          | PTSD       | -2     | 36 | -2  | 704 mm <sup>3</sup>  |
| Boccia et al.        |      |                                                                                                                     | PTSD       | 6      | 38 | -6  | 704 mm <sup>3</sup>  |
| Boccia et al.        |      |                                                                                                                     | PTSD       | -6     | 54 | 6   | 1360 mm <sup>3</sup> |
| Boccia et al.        |      |                                                                                                                     | PTSD       | 4      | 60 | 6   | 1360 mm <sup>3</sup> |
| Hayes et al. (13)    | 2012 | Quantitative meta-analysis of neural activity in posttraumatic stress disorder                                      | PTSD       | 3      | 36 | -6  | 1168 mm <sup>3</sup> |
| Hayes et al.         |      |                                                                                                                     | PTSD       | 16     | 21 | -12 | 440 mm <sup>3</sup>  |
| Hayes et al.         |      |                                                                                                                     | PTSD       | 3      | 36 | -7  | 864 mm <sup>3</sup>  |
| Etkin and Wager (14) | 2007 | Functional Neuroimaging of Anxiety: A Meta-Analysis of Emotional Processing in PTSD, Social Anxiety Disorder, and   | PTSD       | 2      | 38 | -14 | 991 voxels           |
| Etkin and Wager      |      |                                                                                                                     | PTSD       | -14    | 20 | -12 | 33 voxels            |
| Etkin and Wager      |      |                                                                                                                     | PTSD       | -12    | 50 | 20  | 245 voxels           |

| Authors                   | Year | Title                                                                                                                                             | Disorder | Coords |    |     | Size                 |
|---------------------------|------|---------------------------------------------------------------------------------------------------------------------------------------------------|----------|--------|----|-----|----------------------|
|                           |      |                                                                                                                                                   |          | x      | y  | z   |                      |
| Etkin and Wager           |      |                                                                                                                                                   | PTSD     | 18     | 52 | 22  | 43 voxels            |
| Etkin and Wager           |      |                                                                                                                                                   | PTSD     | 12     | 46 | 22  | 23 voxels            |
| Sartory et al. (15)       | 2013 | In Search of the Trauma Memory: A Meta-Analysis of Functional Neuroimaging Studies of Symptom Provocation in Posttraumatic Stress Disorder (PTSD) | PTSD     | -6     | 54 | 22  | 282 voxels           |
| Sartory et al.            |      |                                                                                                                                                   | PTSD     | -12    | 48 | -4  | 133 voxels           |
| Simmons and Matthews (16) | 2012 | Neural circuitry of PTSD with or without mild traumatic brain injury: A meta-analysis                                                             | PTSD     | 1      | 48 | 9   | 1424 mm <sup>3</sup> |
| Stark et al. (17)         | 2015 | Post-traumatic stress influences the brain even in the absence of symptoms: A systematic, quantitative meta-analysis of neuroimaging studies      | PTSD     | -2     | 52 | 0   | 3488 mm <sup>3</sup> |
| Stark et al.              |      |                                                                                                                                                   | PTSD     | 2      | 60 | -12 | 1112 mm <sup>3</sup> |
| Stark et al.              |      |                                                                                                                                                   | PTSD     | 0      | 52 | -12 | 1112 mm <sup>3</sup> |
| Stark et al.              |      |                                                                                                                                                   | PTSD     | -2     | 52 | 0   | 3248 mm <sup>3</sup> |
| Bruhl et al. (18)         | 2014 | Neuroimaging in Social Anxiety Disorder – a meta-analytic review resulting in a new neurofunctional model                                         | SAD      | -6     | 54 | 10  | 1288 mm <sup>3</sup> |
| Bruhl et al.              |      |                                                                                                                                                   | SAD      | -16    | 60 | 15  | 232 mm <sup>3</sup>  |
| Gentili et al. (19)       | 2016 | Beyond emotions: A meta-analysis of neural response within face processing system in social anxiety                                               | SAD      | 7      | 43 | -8  | 96 mm <sup>3</sup>   |
| Gentili et al.            |      |                                                                                                                                                   | SAD      | -2     | 18 | -14 | 200 mm <sup>3</sup>  |
| Kirby and Robinson (20)   | 2015 | Affective mapping: An activation likelihood estimation (ALE) meta-analysis                                                                        | SAD      | -2     | 26 | -4  | NA                   |
| Kirby and Robinson        |      |                                                                                                                                                   | SAD      | 2      | 48 | 2   | NA                   |
| Sugraneys et al. (21)     | 2011 | Autism Spectrum Disorders and Schizophrenia: Meta-analysis of the Neural Correlates of Social Cognition                                           | Schiz    | -6     | 50 | 26  | 64 mm <sup>3</sup>   |

| Authors                 | Year | Title                                                                                                                                                                    | Disorder | Coords |    |     | Size                |
|-------------------------|------|--------------------------------------------------------------------------------------------------------------------------------------------------------------------------|----------|--------|----|-----|---------------------|
|                         |      |                                                                                                                                                                          |          | x      | y  | z   |                     |
| Alustiza et al. (22)    | 2017 | Meta-analysis of functional magnetic resonance imaging studies of timing and cognitive control in schizophrenia and bipolar disorder: Evidence of a primary time deficit | Schiz    | -4     | 30 | 30  | 2004 voxels         |
| Thoma et al. (23)       | 2016 | Functional MRI Evaluation of Multiple Neural Networks Underlying Auditory Verbal Hallucinations in Schizophrenia Spectrum Disorders                                      | Schiz    | -3     | 35 | -2  | NA                  |
| Thoma et al.            | 2016 |                                                                                                                                                                          | Schiz    | 3      | 47 | 9   | NA                  |
| Thoma et al.            | 2016 |                                                                                                                                                                          | Schiz    | -3     | 47 | 9   | NA                  |
| Yan et al. (24)         | 2015 | Rostral medial prefrontal dysfunctions and consummatory pleasure in schizophrenia: A meta-analysis of functional imaging studies                                         | Schiz    | -2     | 44 | 2   | 432 mm <sup>3</sup> |
| Yan et al.              | 2015 |                                                                                                                                                                          | Schiz    | -6     | 32 | -10 | 272 mm <sup>3</sup> |
| Yan et al.              | 2015 |                                                                                                                                                                          | Schiz    | -2     | 32 | -10 | 272 mm <sup>3</sup> |
| Kronbichler et al. (25) | 2017 | Abnormal Brain Activation During Theory of Mind Tasks in Schizophrenia: A Meta-Analysis                                                                                  | Schiz    | -2     | 42 | -6  | 1573 voxels         |



**SUPPLEMENTARY REFERENCES**

1. Engelmann JM, Versace F, Robinson JD, Minnix JA, Lam CY, Cui Y, et al. (2012): Neural substrates of smoking cue reactivity: a meta-analysis of fMRI studies. *Neuroimage*. 60:252-262.
2. Schacht JP, Anton RF, Myrick H (2013): Functional neuroimaging studies of alcohol cue reactivity: a quantitative meta-analysis and systematic review. *Addict Biol*. 18:121-133.
3. Luijten M, Schellekens AF, Kuhn S, Machielse MW, Sescousse G (2017): Disruption of Reward Processing in Addiction : An Image-Based Meta-analysis of Functional Magnetic Resonance Imaging Studies. *JAMA Psychiatry*. 74:387-398.
4. Dickstein SG, Bannon K, Castellanos FX, Milham MP (2006): The neural correlates of attention deficit hyperactivity disorder: an ALE meta-analysis. *J Child Psychol Psychiatry*. 47:1051-1062.
5. McCarthy H, Skokauskas N, Frodl T (2014): Identifying a consistent pattern of neural function in attention deficit hyperactivity disorder: a meta-analysis. *Psychol Med*. 44:869-880.
6. Wegbreit E, Cushman GK, Puzia ME, Weissman AB, Kim KL, Laird AR, et al. (2014): Developmental meta-analyses of the functional neural correlates of bipolar disorder. *JAMA Psychiatry*. 71:926-935.
7. Chen CH, Suckling J, Lennox BR, Ooi C, Bullmore ET. (2011): A quantitative meta-analysis of fMRI studies in bipolar disorder. *Bipolar Disord*.13:1-15.
8. Groenewold NA, Opmeer EM, de Jonge P, Aleman A, Costafreda SG (2013): Emotional valence modulates brain functional abnormalities in depression: evidence from a meta-analysis of fMRI studies. *Neurosci Biobehav Rev*. 37:152-163.
9. Palmer SM, Crewther SG, Carey LM, Team SP (2014): A meta-analysis of changes in brain activity in clinical depression. *Front Hum Neurosci*. 8:1045.
10. Graham J, Salimi-Khorshidi G, Hagan C, Walsh N, Goodyer I, Lennox B, et al. (2013): Meta-analytic evidence for neuroimaging models of depression: state or trait? *J Affect Disord*. 151:423-431.
11. Sacher J, Neumann J, Funfstuck T, Soliman A, Villringer A, Schroeter ML (2012): Mapping the depressed brain: a meta-analysis of structural and functional alterations in major depressive disorder. *J Affect Disord*. 140:142-148.
12. Boccia M, D'Amico S, Bianchini F, Marano A, Gianni AM, Piccardi L (2016): Different neural modifications underpin PTSD after different traumatic events: an fMRI meta-analytic study. *Brain Imaging and Beh*. 10:226-237.
13. Hayes JP, Hayes SM, Mikedis AM (2012): Quantitative meta-analysis of neural activity in posttraumatic stress disorder. *Biology of Mood & Anxiety Disorders*. 2:1-13.
14. Etkin A, Wager TD (2007): Functional neuroimaging of anxiety: a meta-analysis of emotional processing in PTSD, social anxiety disorder, and specific phobia. *Am J Psychiatry*. 164:1476-1488.

15. Sartory G, Cwik J, Knuppertz H, Schurholt B, Lebens M, Seitz RJ, et al. (2013): In search of the trauma memory: a meta-analysis of functional neuroimaging studies of symptom provocation in posttraumatic stress disorder (PTSD). *PLoS One*. 8:e58150.
16. Simmons AN, Matthews SC (2012): Neural circuitry of PTSD with or without mild traumatic brain injury: a meta-analysis. *Neuropharmacology*. 62:598-606.
17. Stark EA, Parsons CE, Van Hartevelt TJ, Charquero-Ballester M, McManners H, Ehlers A, et al. (2015): Post-traumatic stress influences the brain even in the absence of symptoms: A systematic, quantitative meta-analysis of neuroimaging studies. *Neurosci Biobehav Rev*. 56:207-221.
18. Bruhl AB, Delsignore A, Komossa K, Weidt S (2014): Neuroimaging in Social Anxiety Disorder - a meta-analytic review resulting in a new neurofunctional model. *Neurosci Biobehav Rev*. 47:260-280.
19. Gentili C, Cristea IA, Angstadt M, Klumpp H, Tozzi L, Phan KL, et al. (2016): Beyond emotions: A meta-analysis of neural response within face processing system in social anxiety. *Exp Biol Med (Maywood)*. 241:225-237.
20. Kirby LA, Robinson JL (2015): Affective mapping: An activation likelihood estimation (ALE) meta-analysis. *Brain Cogn*.
21. Sugranyes G, Kyriakopoulos M, Corrigall R, Taylor E, Frangou S (2011): Autism spectrum disorders and schizophrenia: meta-analysis of the neural correlates of social cognition. *PLoS One*. 6:e25322.
22. Alustiza I, Radua J, Pla M, Martin R, Ortuno F (2017): Meta-analysis of functional magnetic resonance imaging studies of timing and cognitive control in schizophrenia and bipolar disorder: Evidence of a primary time deficit. *Schizophr Res*.
23. Thoma RJ, Chaze C, Lewine JD, Calhoun VD, Clark VP, Bustillo J, et al. (2016): Functional MRI Evaluation of Multiple Neural Networks Underlying Auditory Verbal Hallucinations in Schizophrenia Spectrum Disorders. *Front Psychiatry*. 7:39.
24. Yan C, Yang T, Yu QJ, Jin Z, Cheung EF, Liu X, et al. (2015): Rostral medial prefrontal dysfunctions and consummatory pleasure in schizophrenia: a meta-analysis of functional imaging studies. *Psychiatry Res*. 231:187-196.
25. Kronbichler L, Tschernegg M, Martin AI, Schurz M, Kronbichler M (2017): Abnormal Brain Activation During Theory of Mind Tasks in Schizophrenia: A Meta-Analysis. *Schizophr Bull*.
